# Supplementary material for: Updated world map of the Köppen-Geiger climate classification
Source: Copernicus journal article supplement (doi:10.5194/hess-11-1633-2007), 2007-10-11
Supplement: Supplementary file 1 [file hess-11-1633-2007-supplement.zip]

# **Guide to the Supplementary Material for**

## **Updated world map of the Köppen-Geiger climate classification**

**Peel MC, Finlayson BL & McMahon TA**

Following is a description of the files included in the Supplementary Material zip file.

- 1) Readme.pdf
  - a. This document.
- 2) World\_Koppen\_Map.jpg
  - a. A large image of the world map
- 3) World\_Koppen\_Map\_Small.jpg
  - a. A smaller image of the world map
- 4) Station.Information.19.2.2007.xls
  - a. An excel spreadsheet containing the precipitation and temperature summary statistics used in the map making process for all stations. See the Readme sheet for details.
- 5) A directory of files relating to the ArcMap raster file. These files successfully load as a raster file in ArcMap 9.1.
  - a. In the raster file there are pixels with values of 31 & 32. These pixels were originally 31 = ETH (high elevation ET) and 32 = EFH (high elevation EF), where the cut-off elevation is 1500m. However, for the final paper we dropped the high elevation category and combined ETH with ET (29 & 31) and EFH with EF (30 & 32).
  - b. The color scheme used in the paper is given on the next page for information.

Murray Peel  
[mpeel@unimelb.edu.au](mailto:mpeel@unimelb.edu.au)  
27/9/2007

## Köppen-Geiger map colour scheme

| Number | Code | Red      | Green | Blue |
|--------|------|----------|-------|------|
| 1      | Af   | 0        | 0     | 255  |
| 2      | Am   | 0        | 120   | 255  |
| 3      | Aw   | 70       | 170   | 250  |
| 4      | BWh  | 255      | 0     | 0    |
| 5      | BWk  | 255      | 150   | 150  |
| 6      | BSh  | 245      | 165   | 0    |
| 7      | BSk  | 255      | 220   | 100  |
| 8      | Csa  | 255      | 255   | 0    |
| 9      | Csb  | 200      | 200   | 0    |
| 10     | Csc  | 150      | 150   | 0    |
| 11     | Cwa  | 150      | 255   | 150  |
| 12     | Cwb  | 100      | 200   | 100  |
| 13     | Cwc  | 50       | 150   | 50   |
| 14     | Cfa  | 200      | 255   | 80   |
| 15     | Cfb  | 100      | 255   | 50   |
| 16     | Cfc  | 50       | 200   | 0    |
| 17     | Dsa  | 255      | 0     | 255  |
| 18     | Dsb  | 200      | 0     | 200  |
| 19     | Dsc  | 150      | 50    | 150  |
| 20     | Dsd  | 150      | 100   | 150  |
| 21     | Dwa  | 170      | 175   | 255  |
| 22     | Dwb  | 90       | 120   | 220  |
| 23     | Dwc  | 75       | 80    | 180  |
| 24     | Dwd  | 50       | 0     | 135  |
| 25     | Dfa  | 0        | 255   | 255  |
| 26     | Dfb  | 55       | 200   | 255  |
| 27     | Dfc  | 0        | 125   | 125  |
| 28     | Dfd  | 0        | 70    | 95   |
| 29     | ET   | Grey 30% |       |      |
| 30     | EF   | Grey 60% |       |      |
